# Supplementary material
Source: publisher site journal article supplement (https://www.dovepress.com/article/224265)
Supplement: Supplementary file 1 [file get_supplementary_file.php]

Table. S1 Stock solution preparation recipe

| Reagent | Concentration (mM) |
| --- | --- |
| NaCl | 1000 |
| KCl | 5 |
| CaCl2 | 25 |
| MgCl2 | 5 |
| NaH2PO4 | 10 |


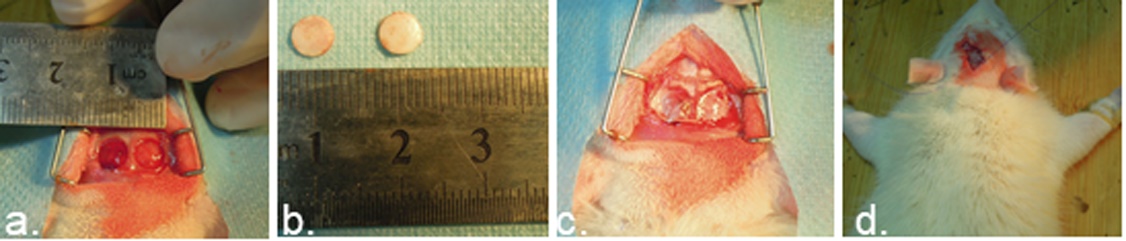


Fig. S1. Preparation of the critical-sized cranial bone defect model and surgical transplantation. (a, b) Expose the cranium and prepare 6-mm-dimaeter circular defects. (c) Implant membranes in the defects. (d) Close the wound.


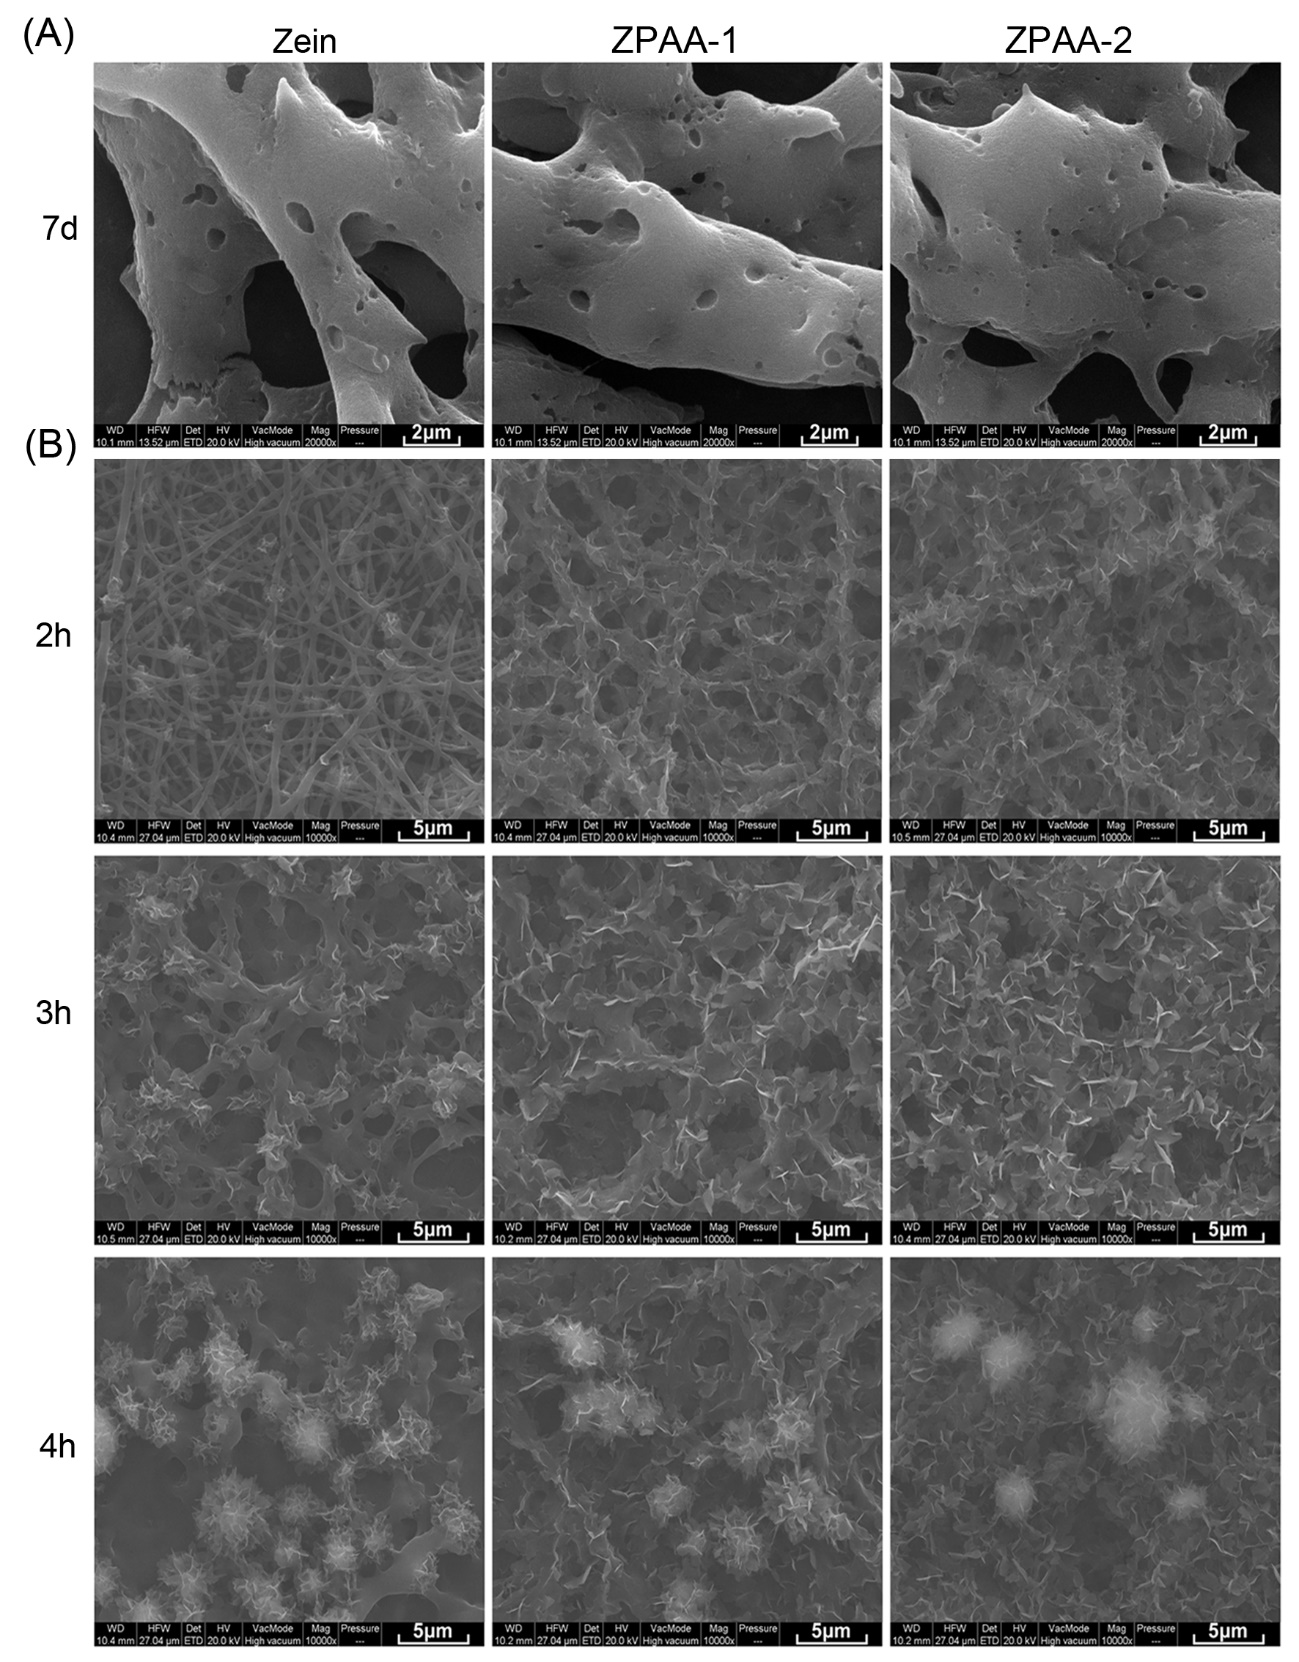


Figure. S2 (A) SEM images of zein, ZPAA-1 and ZPAA-2 membranes after 7 days of biodegradability. (B) SEM images of zein, ZPAA-1 and ZPAA-2 membranes immersed in SBF after 2 h, 3 h and 4 h.
